# Supplementary material for: Investigating the oxidase-like activity of a Co–Fe Prussian blue analogue nanocube prepared in situ and its applications in the colorimetric detection of ascorbic acid, alkaline phosphatase, α-glucosidase, and ascorbic acid oxidase
Source: Royal Society of Chemistry journal article supplement (doi:10.1039/d2nj05460d), 2022-11-30
Supplement: d2nj05460d1.pdf [file d2nj05460d1.pdf]

## Supporting Information

### **Investigating the oxidase-like activity of a Co-Fe Prussian blue analog nanocube prepared in situ and its applications in colorimetric detection of ascorbic acid, alkaline phosphatase, $\alpha$ -glucosidase, and ascorbic acid oxidase**

Li-Jing Peng <sup>a</sup>, Shi-Jun Yin <sup>a</sup>, Li Chen <sup>b</sup>, Tao Tian <sup>a</sup>, Wei-Yi Zhang <sup>a</sup>, Hang-Yu Zhou <sup>a</sup>,

Feng-Qing Yang <sup>a\*</sup>

<sup>a</sup> School of Chemistry and Chemical Engineering, Chongqing University, Chongqing,  
401331, PR China

<sup>b</sup> College of Optoelectronic Engineering, Key Laboratory of Optoelectronic  
Technology and Systems, Ministry of Education, Key Disciplines Lab of Novel  
Micro-Nano Devices and System Technology, Chongqing University, Chongqing  
400044, PR China

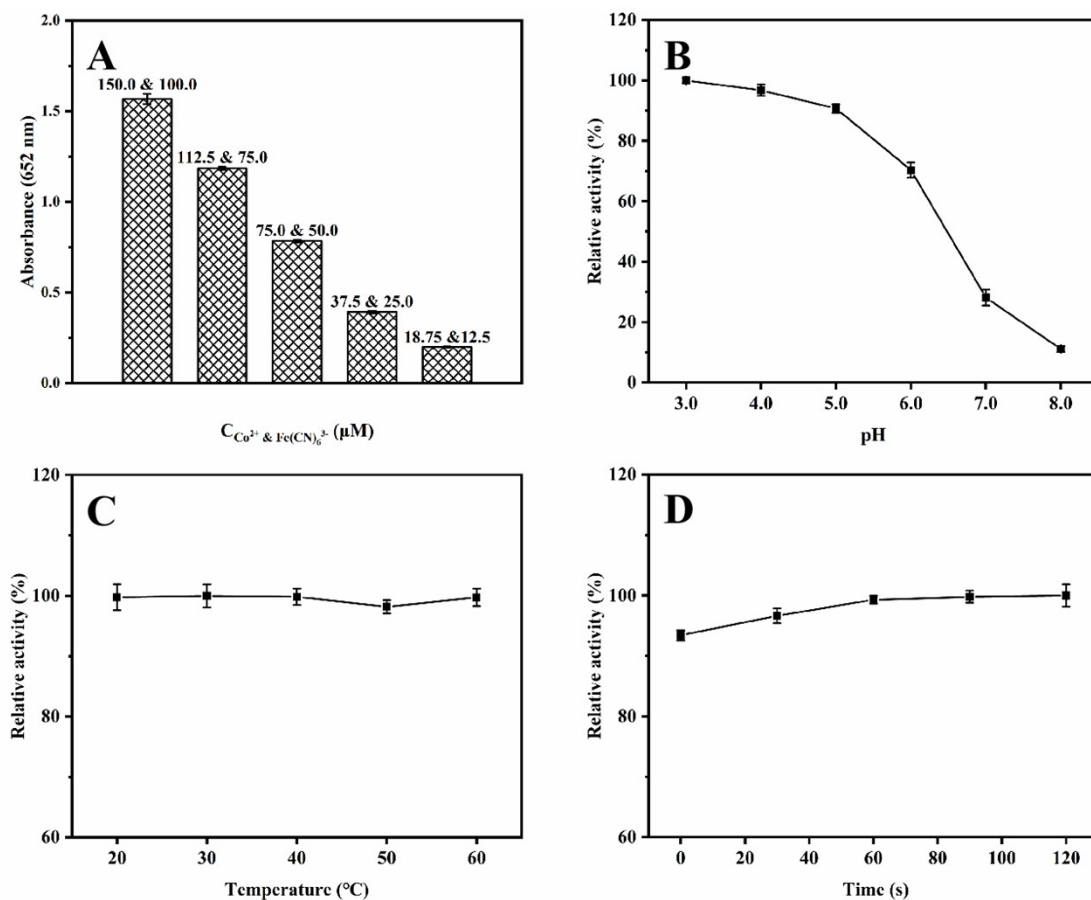

**Fig. S1.** Effect of the concentration of  $\text{Co}^{2+}$  and  $\text{Fe(CN)}_6^{3-}$  (**A**), pH (**B**), temperature (**C**), and incubation time (**D**) on the oxidase-like activity of Co-Fe PBA NC. Other conditions: 75.0  $\mu\text{M}$  of  $\text{CoCl}_2 \cdot 6\text{H}_2\text{O}$ , 50.0  $\mu\text{M}$  of  $\text{K}_3\text{Fe(CN)}_6$ , and 2.5 mM of TMB. The maximum point in each curve is set as 100%. The error bars represent the standard deviations of three independent measurements.

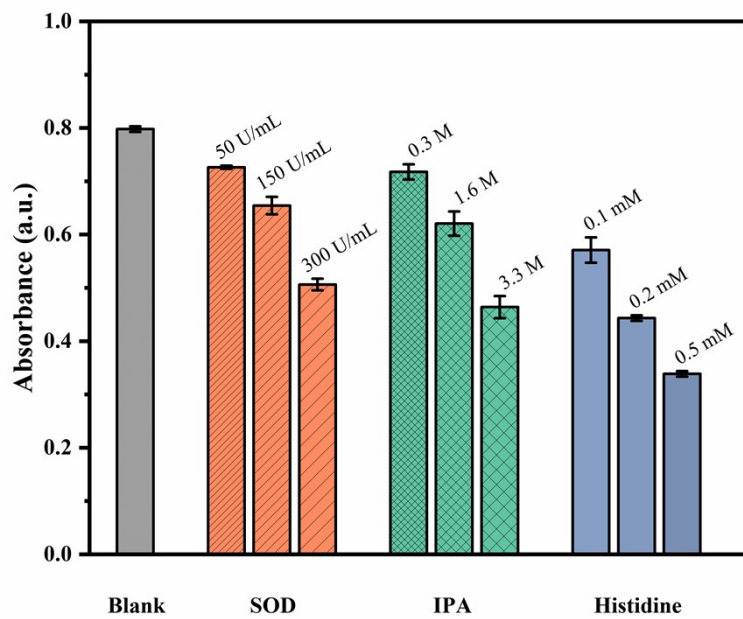

**Fig. S2.** Effects of various active scavengers on the catalysis of TMB by Co-Fe PBA NC nanozyme. Error bars represent the standard deviations of three independent measurements.

**Table S1.** Comparisons of the kinetic parameters of Co-Fe PBA NCs, HRP, and some reported nanozymes.

| Catalysts    | Substrate | $K_m$ (mM) | $V_{max}$ ( $10^{-8} \text{ M s}^{-1}$ ) | Ref.      |
|--------------|-----------|------------|------------------------------------------|-----------|
| HRP          |           | 0.434      | 10.00                                    | 1         |
| PCN-224-Mn   |           | 0.243      | 13.72                                    | 2         |
| BSA-SeNPs    | TMB       | 0.859      | 0.53                                     | 3         |
| CS-SeNPs     |           | 0.852      | 2.38                                     | 3         |
| IrNPs        |           | 0.280      | 13.650                                   | 4         |
| Co-Fe PBA NC |           | 0.163      | 0.835                                    | This work |

HRP: horseradish peroxidase; PCN-224-Mn: Mn-modified porphyrin metal-organic framework; BSA-SeNPs: selenium nanoparticles synthesized with bovine serum albumin; CS-SeNPs: selenium nanoparticles synthesized with chitosan; IrNPs: Iridium nanoparticles.

**Table S2.** Comparisons of the colorimetric detection of AA, ALP,  $\alpha$ -Glu, and AAO by using various peroxidase mimics.

| Nanozyme                           | Analyte       | Linear range      | LOD          | Ref.      |
|------------------------------------|---------------|-------------------|--------------|-----------|
| IrO <sub>2</sub> /MnO <sub>2</sub> | AA            | 0–312.5 $\mu$ M   | 1.23 $\mu$ M | 5         |
| CeVO <sub>4</sub>                  | ALP           | 1–210 U/L         | 0.68 U/L     | 6         |
| Gold Nanorod                       | ALP           | 5–100 U/L         | 3.3 U/L      | 7         |
| SA-Pt/CN                           | $\alpha$ -Glu | 10–8000 U/L       | 3.8 U/L      | 8         |
| MnO <sub>2</sub> NS                | $\alpha$ -Glu | 200–8000 U/L      | 30.0 U/L     | 9         |
| PLPs                               | AA            | 1.0–45.0 $\mu$ M  | 0.2 $\mu$ M  | 10        |
|                                    | AAO           | 1–20 U/L          | 0.25 U/L     |           |
| DNA-Au/Ag NC                       | AA            | 5.0–150.0 $\mu$ M | 0.6 $\mu$ M  | 11        |
|                                    | AAO           | 10–200 U/L        | 4.8 U/L      |           |
| Co-Fe PBA NC                       | AA            | 1.0–15.0 $\mu$ M  | 0.40 $\mu$ M | This work |
|                                    | ALP           | 5–120 U/L         | 0.91 U/L     |           |
|                                    | $\alpha$ -Glu | 10–200 U/L        | 8.54 U/L     |           |
|                                    | AAO           | 0.25–5 U/L        | 0.16 U/L     |           |

AA: ascorbic acid; ALP: alkaline phosphatase;  $\alpha$ -Glu:  $\alpha$ -glucosidase; AAO: ascorbate oxidase; SA-Pt/CN: Pt single-atom; MnO<sub>2</sub> NS: MnO<sub>2</sub> nanosheet; PLPs: persistent luminescent particles; DNA-Au/Ag NC: DNA-templated gold-silver nanoclusters.

---

## References

- 1 L.Z. Gao, J. Zhuang, L. Nie, J.B. Zhang, Y. Zhang, N. Gu, T.H. Wang, J. Feng, D.L. Yang, S. Perrett and X. Yan, *Nat. Nanotechnol.*, 2022, **2**, 577-583.
- 2 X. Lai, Y. Shen, S.B. Gao, Y.J. Chen, Y.S. Cui, D.X. Ning, X.B. Ji, Z.W. Liu and L.G. Wang, *Biosens. Bioelectron.*, 2022, **213**, 114446.
- 3 H. Cao, J.Y. Xiao and H.M. Liu, *Biochem. Eng. J.*, 2020, **152**, 107384.
- 4 M.L. Cui, Y. Zhao, C. Wang and Q.J. Song, *Microchim. Acta*, 2017, **184**, 3113-3119.
- 5 Y.Y. Zhong, Q.L. Li, M.L. Lu, T.T. Wang, H.Y. Yang, Q.Y. He, X.P. Cui, X.G. Li and S.Q. Zhao, *Microchim. Acta*, 2020, **187**, 675.
- 6 K. Ye, X.H. Niu, H.W. Song, L.J. Wang and Y.X. Peng, *Anal. Chim. Acta*, 2020, **1126**, 16-23.
- 7 Z.Q. Gao, K.C. Deng, X.D. Wang, M. Miro and D.P. Tang, *ACS Appl. Mater. Interfaces*, 2014, **6**, 18243-18250.
- 8 G. Kang, W.D. Liu, F.N. Liu, Z. Li, X.Y. Dong, C.X. Chen and Y.Z. Lu, *Chem. Eng. J.*, 2022, **449**, 137855.
- 9 M.L. Shi, Y. Cen, G.H. Xu, F.D. Wei, X.M. Xu, X. Cheng, Y.Y. Chai, M. Sohail and Q. Hu, *Anal. Chim. Acta*, 2019, **1077**, 225-231.
- 10 C. Yao, G.Q. Zhang, Y. Guan, T. Yang, R. Hu and Y.H. Yang, *Spectrochim. Acta A*, 2022, **280**, 121564.
- 11 S.Y. Liu and S. Pang, *Microchim. Acta*, 2018, **185**, 426.
